# Supplementary material for: Microtubule motors involved in nuclear movement during skeletal muscle differentiation
Source: PubMed Central journal article supplement — Mol Biol Cell. 2017 Apr 1;28(7):865–74. doi: 10.1091/mbc.E16-06-0405 (PMC5385935; doi:10.1091/mbc.e16-06-0405), 2017-04-01
Supplement: supp_E16-06-0405v1_CombinedSupMats.pdf [file supp_E16-06-0405v1_CombinedSupMats.pdf]

# Supplemental Materials

*Molecular Biology of the Cell*

Gache et al.

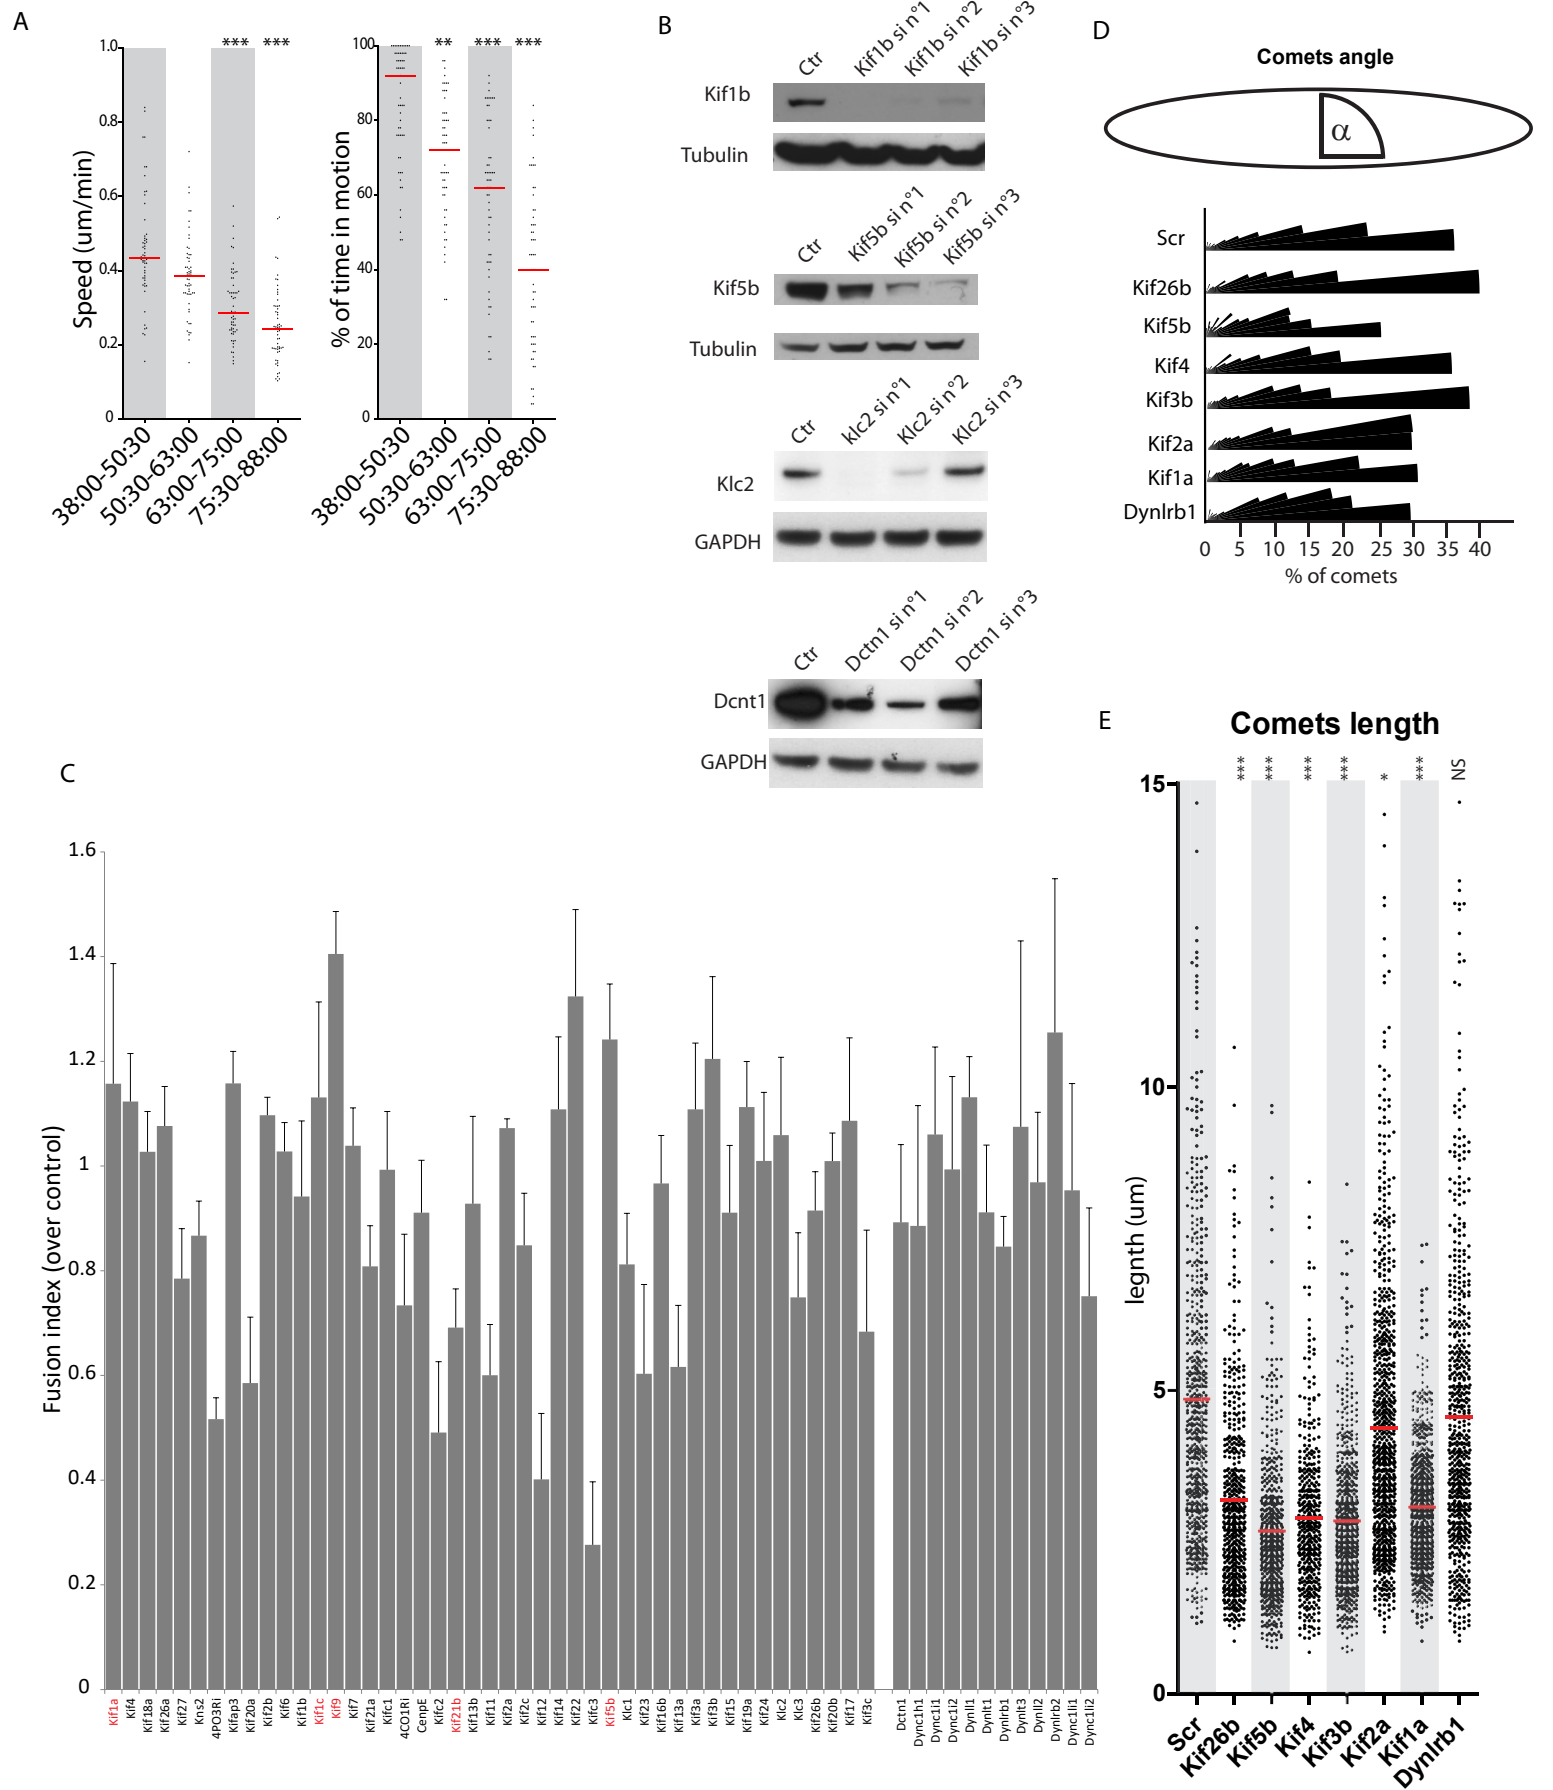

Fig S1

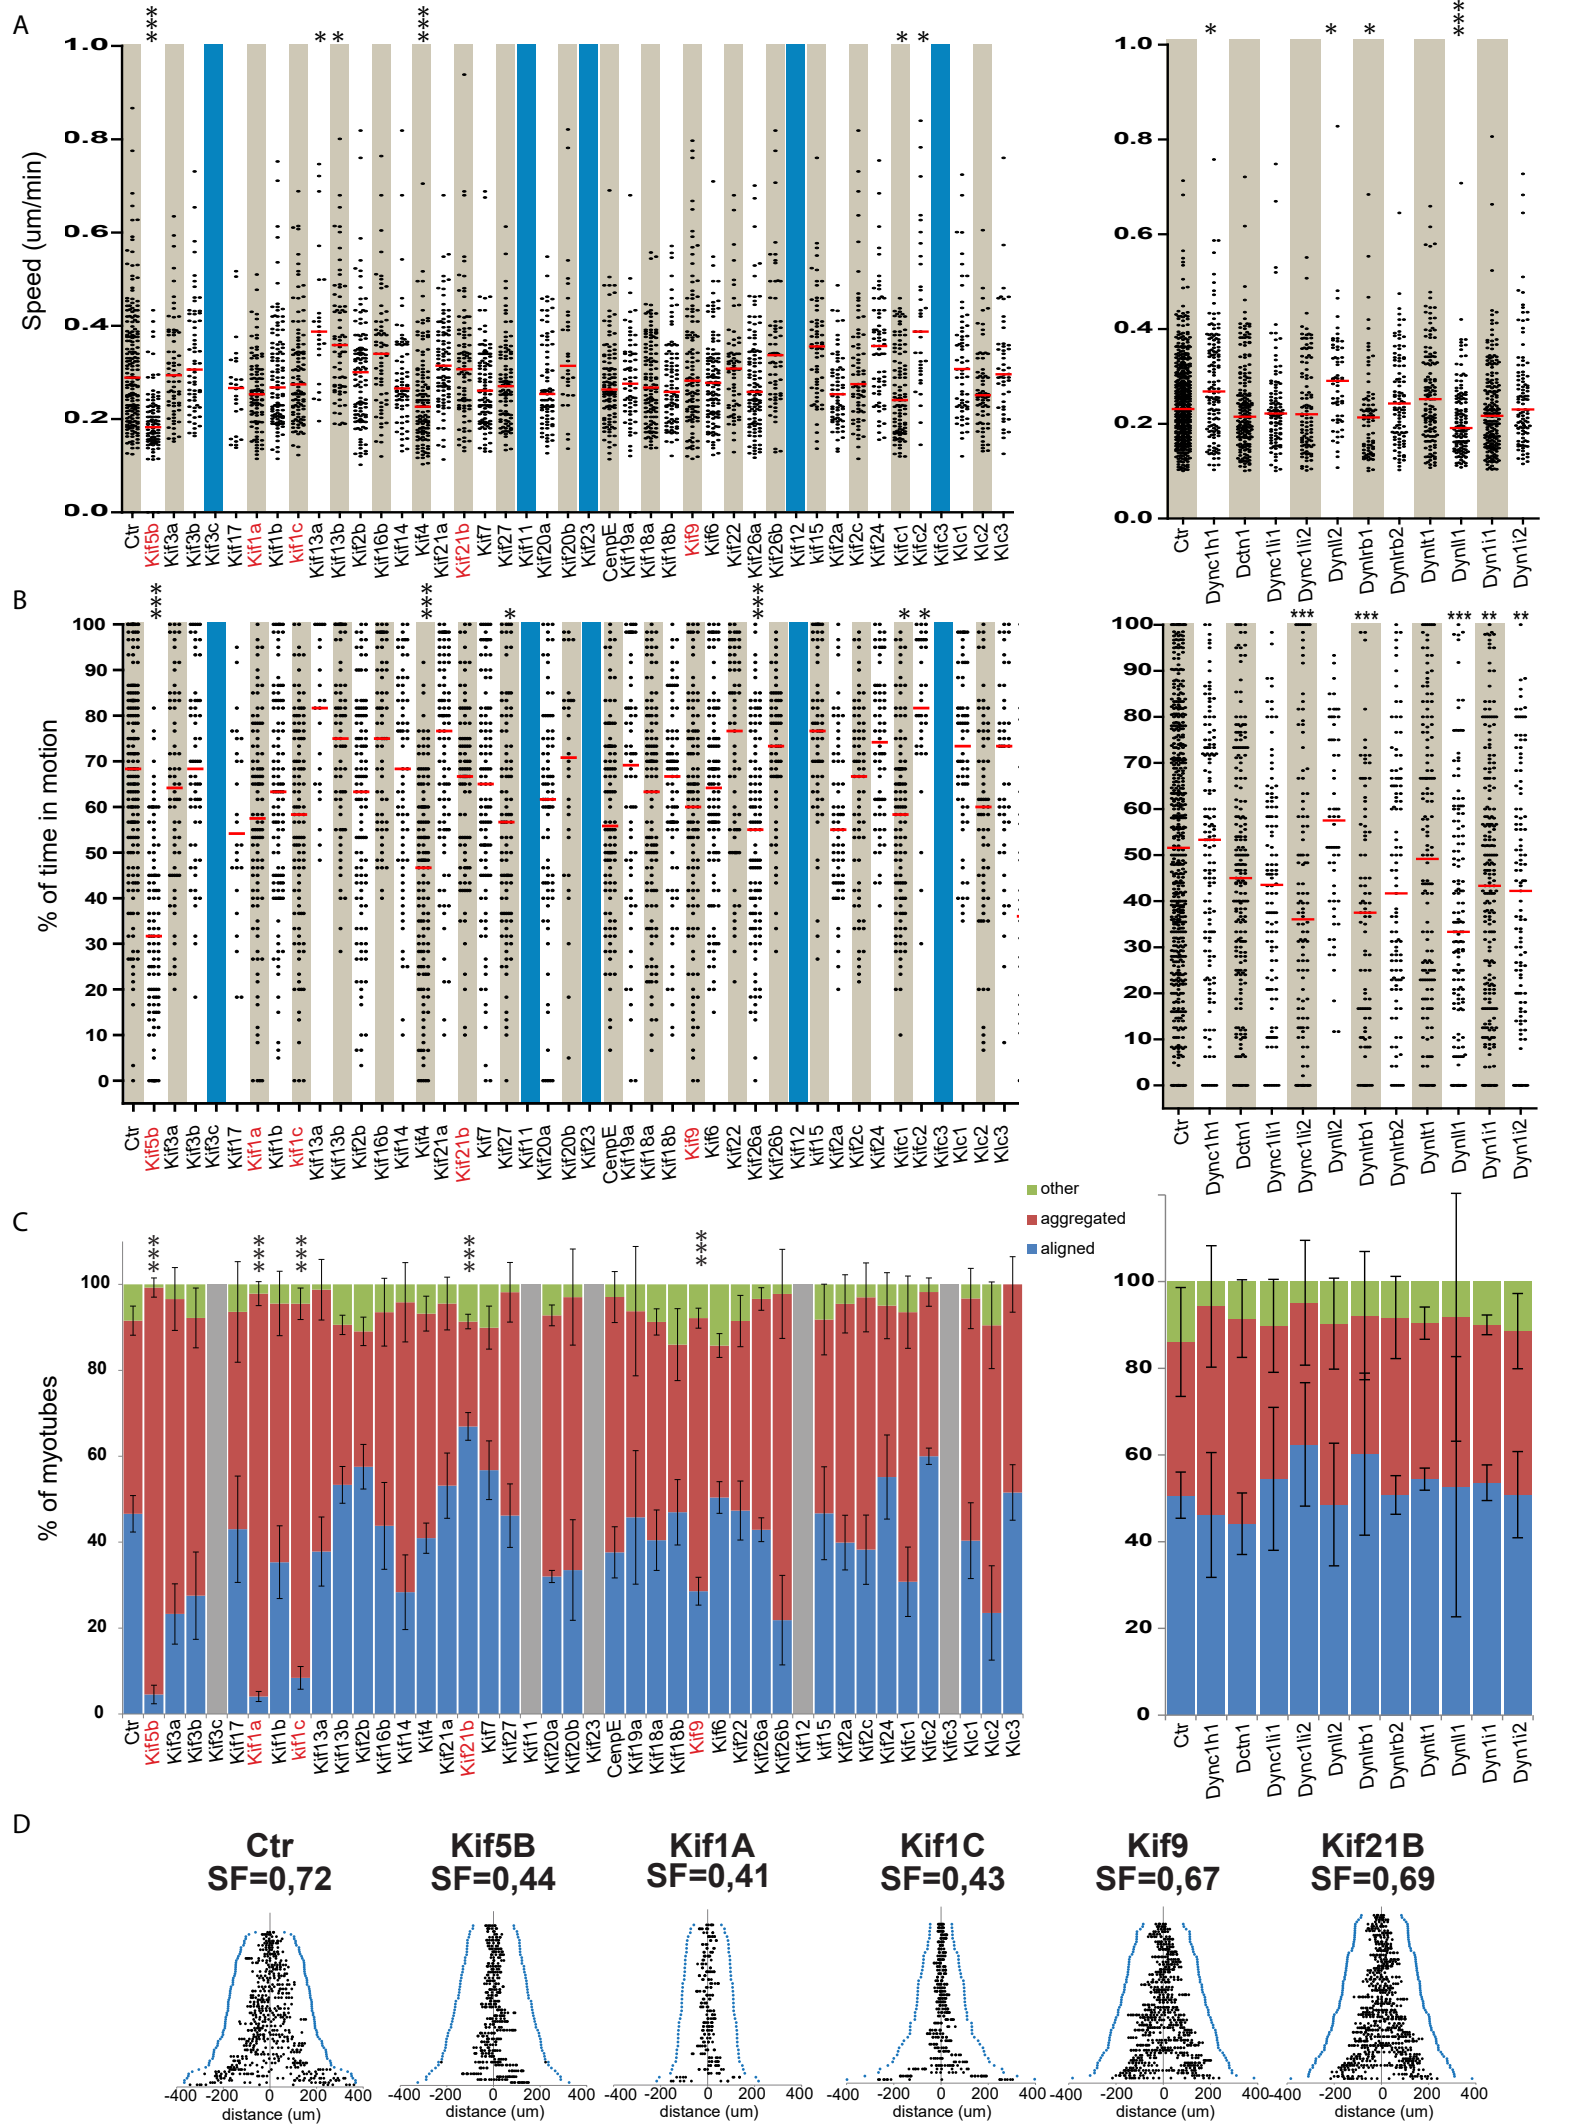

Fig S2

### Supplementary Figure 1. Interfering with nuclear movement inside myotubes.

**A:** Nuclear speed and percentage of time in motion during four successive intervals after differentiation. At least 57 nuclei were monitored from 3 different experiments. **B:** Expression levels after silencing of Kif1b, Dctn1, Kif5b and Klc2. **C:** Fusion index over control after depletion of the indicated motors. Average of three independent experiments is represented. **D:** Angles of EB1 comets were measured compared to the longest myotube axis. All angles were averaged on a 90° quadrant to facilitate reading, and sampled every 5°. **E:** The length of EB1 comets was measured over a period of 200s.

### Supplementary Figure 2. Screening for nuclei behavior inside myotubes

Speed (**A**), Time in motion (**B**) and nuclear distribution (**C**) of nuclei inside myotubes from differentiated GFP-H1-C2 cells in non-treated (ctrl), myotubes treated with 50 nM siRNA targeting kinesin and dynein members. Red line indicates the median. In average 110 nuclei were monitored from three different experiments. Nuclear distribution is quantified as “aligned” if >70% of nuclei are aligned along the same axis; “aggregated” if >70% of nuclei do not align along the same axis; “other” if nuclei are both aggregated and aligned in the same myotube. Silencing of kinesins required for cell cycle progression was not analyzed as their depletion induced cell death before differentiation was induced (blue bars). **D:** Representation of nuclei spreading in several myotubes after siRNA for the indicated proteins with the corresponding spreading factor. Each horizontal line represents a myotube, with the extremities depicted as blue dots. Each nucleus is a black dot.

### Supplementary movie 1

Phase contrast time-lapse movies of myotubes in presence of 75 nM Nocodazole, or 100 nM Taxol or 200nM Jasplakinolide or 10 nM cytochalasine D as indicated.

**Table1** Listing of siRNA sequences and Taqman probes used for each molecular motor.

| RefSeq Accession Number | Gene Symbol | Sense siRNA Sequence  | Antisense siRNA Sequence | Taqman Assay ID |
|-------------------------|-------------|-----------------------|--------------------------|-----------------|
| NM_008440               | Kif1a       | GGACAUCAACUAUGCCUCUtt | AGAGGCAUAGUUGAUGUCctc    | Mm00492863_m1   |
|                         |             | GGAAACAGAGAAGAUCAUtt  | AAUGAUCUUCUCUGUUUCctt    |                 |
|                         |             | CCAAGUCCUUAUCGAAUAtt  | UAUUCGAUGAAGGACUUGGtc    |                 |
| NM_207682               | Kif1b       | CGGGCUGAUUCAACUGGUGtt | CACCAGUUGAAUCAGCCCGtt    | Mm00801827_m1   |
|                         |             | CCUCA AUGAAGACCAUAtt  | UAAUGGGUCUUCAUUGAGGtt    |                 |

|              |        |                         |                        |               |
|--------------|--------|-------------------------|------------------------|---------------|
|              |        | GGAUGGAAUACAAGGUUtt     | AACCCUUGUAAUCCAUCt     |               |
| NM_153103    | Kif1c  | CCUUCGACUUAUCUUCUGtt    | CAGUAGAAUAGUCGAAAGtg   | Mm00462184_m1 |
|              |        | GAAACAGAGAAGAUCAUAtt    | UAUGAUCUUCUCUGUUUCctg  |               |
|              |        | CCAUGUUUCCGCUUCAUtt     | AUUGAAGCGGAAAACAUGGtt  |               |
| NM_008442    | Kif2a  | GGGAAUUUAUGCAUAGCAtt    | UGCUAAUGCAUAAAUCCTt    | Mm00515233_m1 |
|              |        | CGCAGAUCAAUUUUCUAGtt    | CUAUGAAAAUUGAUCUGCGtt  |               |
|              |        | GCUCCUAAUGAAAUUGGUUtt   | AAACCAUUUCAUUAGGAGctg  |               |
| NM_134471    | Kif2c  | GGAGGUACCACAAAAGGCAtt   | UGCCUUUUGUGGUACCUCctt  | Mm00728630_s1 |
|              |        | GGCAAAGAGAUUGACAUUGtt   | CAAUGUCAAUUCUUUGCCtt   |               |
|              |        | GCAGAAUUUACAAGUCUCtt    | GAGACUUGUUAAUUUCUGctc  |               |
| NM_008443    | Kif3a  | GGGCACACAAAGUUUUUGtt    | CAAAAACCUUGUGUCGCCctc  | Mm01288585_m1 |
|              |        | GGGACCAAGCAGGUAAAAAtt   | UUUUUACCUGCUUGGUCCctt  |               |
|              |        | CCGUAAUUGAUUCUUUACUtt   | AGUAAAGAAUCAAUUACGGctc |               |
| NM_008444    | Kif3b  | GGAUUUGUCUUCUUUUGUCtt   | GACAAAAGAAGACAAAUCctt  | Mm00492891_m1 |
|              |        | GGUGGUAGAUUGCGAUGUGtt   | CACAUCCGCAUCUACCACctt  |               |
|              |        | GGGUUUCAUUGGCACAAUtt    | AAUUGUGCCAUUGAAACCCctg |               |
| NM_008445    | Kif3c  | GGAGAAUCCUGAAACAGGGtt   | CCCUGUUUCAGGAUUCUCctt  | Mm00492900_m1 |
|              |        | GGAAGAUAGUAAACAACAAtt   | GUUGUUGUUUAUCAUCUUCctc |               |
|              |        | CCGGCUAUCUUUGAUGGtt     | CCAUCUCAAGAUAGCCGGctg  |               |
| NM_008446    | Kif4   | GGUGGUGGUUGGUAUAGUtt    | AUCAUUACCAACCACCctg    | Mm00492908_m1 |
|              |        | GGAAGAGGUCUUUAAUACAtt   | UGUAUUAAAGACCUCUUCctg  |               |
|              |        | GGAUACAUGCAACUGUCctt    | GGACAGUUGCAUUGUAUCctt  |               |
| NM_177052    | Kif6   | CCUGGCAGAUUGGAUUCGUAtt  | UACGAUCCAUCUGCCAGGctc  | Mm00723857_m1 |
|              |        | GCUUCAACCCGGUCACACUtt   | AGUGUGACCGGGUUGAAGctt  |               |
|              |        | CGAAUGUGGCUAUGACCUGtt   | CAGGUCAUAGCCACAUCGctt  |               |
| NM_010628    | Kif9   | GGACUUGUUUAUGAAACAtt    | UGUUUCAUAAACCAAGUCctg  | Mm00495130_m1 |
|              |        | GCAUCGACAUCCACUUGAAtt   | UUCAAGUGGAUGUCAUGctt   |               |
|              |        | GGCUUGUCAGUGCAUCUCAtt   | UGAGAUGCACUGACAAGCctc  |               |
| NM_010615    | Kif11  | CCAUUUAAUCUGGCAGAGctt   | GCUCUGCCAGAUUAAUUGGctc | Mm01204225_m1 |
|              |        | CCUUGUUAAAAUUGGAAAGtt   | CUUUCCAUUUUUACAAGctc   |               |
|              |        | GGUCUACUGAUUAAUCAAtt    | UUGAUUUAUUCAGUAGACCctc |               |
| NM_010616    | Kif12  | CCUGGCUAUUAGAUCCGCUtt   | ACGGCAUCUAAUAGCCAGGctg | Mm00802885_m1 |
|              |        | CCUGAGUCUCGGUUCACAAtt   | UUGUGAACCCGAGACUCAGGtt |               |
|              |        | CCUUCACCUGGCUAUUAGAtt   | UCUAAUAGCCAGGUGAAGGctc |               |
| NM_010617    | Kif13a | GGUAUCGUUAUUGGAGAUctt   | GAUCUCCAUAUCGAUACCctc  | Mm00660179_m1 |
|              |        | GGGAAUUAAGUCUCGAAACtt   | CGUUCGAGACUUUUUUCCTc   |               |
|              |        | GCUGGAGAAUAGCUAAUtt     | AAUAGCUUUAUUCUCCAGctt  |               |
| NM_010620    | Kif15  | GGAGUCUGUUAUCUCAACAtt   | UGUUGAGAAUACAGACUCCctg | Mm01341275_m1 |
|              |        | GCGGUUAUAUUGGACCAUtt    | AUGGUCCCAUUAUACCCctc   |               |
|              |        | GCAAACCUCAAUCUUGAAAtt   | UUUCAAGAUUGAGGUUUGctt  |               |
| NM_010623    | Kif17  | GGCAGUGGGAAGUCUUUCAtt   | UGAAAGACUUCACCACUGCctg | Mm00456740_m1 |
|              |        | GGAGGCCACAAAUAUACtt     | GUUAAUUUUGGUGGCCUCctt  |               |
|              |        | CCCUGAUGAAUAAGGACUCtt   | GAGUCCUUAUUCUACAGGGctg |               |
| NM_139303    | Kif18a | GGCGGUGCAGUUCUGUAAAtt   | UUUACAGAACUGCACCCGctt  | Mm01327661_m1 |
|              |        | GCCAAUCCUUAUAGUUUtt     | AAAACUAUGAAGGAUUGGctt  |               |
|              |        | CGUGCUUAAACUUACUCCAtt   | UGGAGUAAGUUUAAGCACctt  |               |
| NM_028547    | Kif2b  | CCAAUGAACUAGUUUACCATT   | UGGUAAACUAGUUAUUGGAT   | Mm01308520_s1 |
|              |        | CGACAAUACGAAUUCGGGATT   | UCCCGAAUUCGUUUUGUCGTT  |               |
|              |        | GCUCCAUAUCACUACGAAATT   | UUCUCGUAGUGAUUGGAGCTT  |               |
| NM_010626    | Kif7   | GGAGAACGGCUCAAAGAGATT   | UCUCUUUGAGCCGUUCUCCGG  | Mm01320530_m1 |
|              |        | GCCUGGAGAUUGAUAGCAATT   | UUGCUAUCAAUCCAGGCGCT   |               |
|              |        | CAACAGCAAAAAGAUCCUAGATT | UCAGGAUCUUUUGCUGUUGCT  |               |
| NM_001081177 | Kif13b | AGACGGGCAUUGUACGGUATT   | UACCGUACAUAUCCCGUCUTG  | Mm01314840_m1 |
|              |        | GGCUAGAAGUAACAUCUGATT   | UCAGAUGUUACUUCUAGCCTC  |               |
|              |        | CCAUCUCCCAUGGUGGUUATT   | UAACCACCAUGGGAGAUUGGAG |               |
| NM_001081258 | Kif14  | CAGGGAUUGCUGUUCGGAUATT  | UAUCCGAACAGCAUCCUGCA   | Not available |
|              |        | CCUCUGUUCGAGUUCGUAAATT  | UUACGAACUCGAACAGAGGTA  |               |
|              |        | GGAAGUCCUAUACGAUGATT    | UCAUCGUUAUAGGACUUUCCAG |               |
| NM_001081133 | Kif16b | GUACAUAUUACAUAUATT      | UAUAUGUUGAAUUAUGUACAT  | Mm01327880_m1 |
|              |        | CACUUAAGAGAAUACCUCATT   | UGAGGUAAUUCUUAAGUGTG   |               |
|              |        | GGAUUUGGAUUUAAUUAUATT   | UAUUUUUAAAUCCAAAUCCAA  |               |
| NM_001102615 | Kif19a | GAAGGAGUCCUACACCAAAATT  | UUUGGUGUAGGACUCCUUCCT  | Mm01244862_m1 |
|              |        | CAACUAUCGGGACAGCAAAATT  | UUUGCUGUCCCGAUAGUUGAT  |               |
|              |        | CAAUCUAUCUAGCAGCACATT   | UGUGCUGCUAGAUAGAUUGTC  |               |
| NM_183046    | Kif20b | CAACGGUAGAAGUAAGUAAATT  | UUACUUACUUCUACCGUUGAT  | Mm01205010_m1 |
|              |        | CCAACGAUCUAAGUGCAAATT   | UUUGCACUUAGAUUGGTT     |               |

|              |         |                        |                         |               |
|--------------|---------|------------------------|-------------------------|---------------|
|              |         | CGCAAUAAUUUGCAUGAUATT  | UAUCAUGCAAUUUUUGGCCA    |               |
| NM_001097621 | Kif26a  | UGACGAGUUUGAUGCUUAUTT  | AUAAGCAUCAAAACUCGUCATT  | Mm01339746_m1 |
|              |         | GCCUGAACGUAUGUCGAATT   | UUCGACAUACGUUCAGGGCCT   |               |
|              |         | AGAUCAGGGUGUACGAAAUATT | AUUUCGUACACCUUGAUCUCA   |               |
| NM_009004    | Kif20a  | GGACCUGUUGUCAGACUGCtt  | GCAGUCUGACAACAGGUCCtt   | Mm00436226_m1 |
|              |         | GGUGAAAGUUUACCUUCGAtt  | UCGAAGGUAACUUUCACctt    |               |
|              |         | CGUACACCAUUCAGGUACctt  | GUACCUUGAAUGGUGUACGtt   |               |
| NM_016705    | Kif21a  | GGAUUUGCCAGUAAUUAAtt   | UUAAUUACUGGCAAUAUCctc   | Mm00497322_m1 |
|              |         | CCCAGUGCAUCGAAAGCt     | AGCUUUUCGUAUGCACUGGGtg  |               |
|              |         | CGAAGAGAUACGUAUUAUGtt  | CAUAUUACUGAUCUCUUCGtt   |               |
| NM_019962    | Kif21b  | GGAAAAAGUUCCAAAGAAAtt  | UUCUUUUGGAACUUUUUCctg   | Not available |
|              |         | GGAGAAGAUUCUGUCUUCGtt  | GCAAGACAGCAUCUUCUCctt   |               |
|              |         | GGCUGUCUAAAAAGAACAUtt  | AUGUUCUUUUUGAGCAGCctg   |               |
| NM_145588    | Kif22   | GGAAUCUAUGUAGGUUACtt   | UGAACCUACAUAGACUUCctg   | Mm01139072_m1 |
|              |         | GGGCAGAAUGCCAGUGUACtt  | GUACACUGGCAUUCUGCCctt   |               |
|              |         | GGAAACUCUACCUUAUUGtt   | CAAUAAGGUAGAGUUUUCctt   |               |
| NM_024245    | Kif23   | GGGCUAUCGACUCAACAGAtt  | UCUGUUGAGUCGAUAGCCctc   | Mm00458527_m1 |
|              |         | GGAAAAAGAGCAAUUUUCAtt  | AGUAAUUUGCUCUUUUUCctg   |               |
|              |         | GCAUAGGGUCAUUUCAAGCtt  | GCUUGAAAUGACCCUAUGCtg   |               |
| NM_024241    | Kif24   | GCCAAGAGGACAUUUGGCAtt  | UGCCAAAUGUCCUCUUGGctg   | Mm01211351_m1 |
|              |         | CCAGCAUUCACCGACAAAtt   | UUUGUCAGGUGAAUGCUGGtg   |               |
|              |         | GCAUGUGGUACAGAUAGCUtt  | AGCUAUCUGUACCAUAGCctt   |               |
| NM_177757    | Kif26b  | GGAGAGAGAUGAAUUUGAtt   | UCAAAUUUAUCUCUCUCctt    | Not available |
|              |         | CCUUCGAGACCUGUUUGUCtt  | AGACAACAGGUCUCGAAGGtt   |               |
|              |         | GCUCUCAGCAAAAACCGAGtt  | CUCGGUUUUUGCUGAGAGctt   |               |
| NM_175214    | Kif27   | GGAUUCUACUUCUUAUAGtt   | CUUAUAGAAGUAGAGAUCctt   | Mm00723524_m1 |
|              |         | GGCCAUGUUGCAUCAGUUGtt  | CAACUGAUGCAACAUGGCCctc  |               |
|              |         | GGCUAAUAGAAGUGAAGUtt   | ACUUCACUUCUUUAUAGCCtg   |               |
| NM_053173    | Kifc1   | GGAAUCUAGAGGCAAUUUCtt  | GAUUAUUGCCUUCAGUUCctt   | Mm03011779_m1 |
|              |         | GGCCAUUAACAGCAGUCUGtt  | CAGACUCUGUUAAUUGCCtg    |               |
|              |         | GGAGGAACAGAGAUUUGGtt   | CCAACUCUCUGUUCUCCctc    |               |
| NM_010630    | Kifc2   | GGUCAACCUUUAAAAACAtt   | UGUUUUUUAAAGGUUGACctg   | Mm00495161_m1 |
|              |         | GCUGAGUAGACUUCGUCUGtt  | CAGACGAAGUCUACUCAGctc   |               |
|              |         | GGGCAUGUAUUAUUGUUCtt   | GAACAUUAUACAUGCCctt     |               |
| NM_010631    | Kifc3   | CGCUACAAUGGGCUCAAGtt   | CUUGAGCCCAUUGUAGUCctt   | Mm00516085_m1 |
|              |         | GGUUAAUAGCAACAACAGtt   | CUGGUUGUUGCUAUUAACctc   |               |
|              |         | GGCGGUAUCCAGGGUUUAAtt  | UAAACCCUGGAUCACCCctt    |               |
| NM_008451    | Kifc2   | GGGUUUAGAGACCCUGAGAtt  | UCUCAGGGUCUCUAAACCCtg   | Mm00492945_m1 |
|              |         | GGUGGUAGAUCUGUUAUAAAtt | UUUUAAACAGUUCUACCActt   |               |
|              |         | CAAUGUGGCCAAGACUAAAtt  | UUAGUCUUGGCCCAUUAUGggg  |               |
| NM_146182    | Kifc3   | GGAGGCUAGCCCAAGAGAAAtt | UUCUCUUGGGCUAGCCUCctg   | Mm00461422_m1 |
|              |         | AUGGAAAACGUGGACGUUAAtt | UAACGUCCACGUUUUCCAuag   |               |
|              |         | GGAGGAGAAGAAACACCGUtt  | CAGGUGUUUCUUCUCCUCctc   |               |
| NM_001025360 | Kifc1   | CCUAGCAGUACUGUACGGUtt  | ACCGUACAGUACUGCUAGGtt   | Mm00492936_m1 |
|              |         | GGGAUCAGAAACAAGUUAAtt  | UUUAUCUUGUUCUGAUCCCctg  |               |
|              |         | CGAGCGGAUGCUGUUAUUtt   | AAAUACCAGCAUCCGCUCctc   |               |
| NM_197959    | Kif18b  | CGCCAGCAGUUAACUAGAGAtt | UCUCAAGUAACUGCUCGCGctg  | Mm01253048_g1 |
|              |         | CCUACGAGGAUACUUAACAAtt | UUGUAAGUAUCCUCGUAGGctc  |               |
|              |         | GGUUCAGAAGACUUAAGACAtt | UGUCUUAAGUUCUUGAACctt   |               |
| NM_173762    | Cenpe   | GGAAUUGUCUCAAAGAUUUtt  | AAAUCUUUGAGCAUUUCctc    | Mm00620549_m1 |
|              |         | GGAUUACUGAUCUCCAAAAtt  | UUUUGGAGAUCAGUAAUCCctt  |               |
|              |         | GGAGAAAGAAUUCAUUUCctt  | GGAAUAGAAUUCUUUCUCCctc  |               |
| NM_030238    | Dync1h1 | GCUCUGUGAUUUGAUGCAGtt  | CUGCAUCAAUACAGGAGctc    | Mm00466548_m1 |
|              |         | GGAGGUUAUGUUUAAAACUtt  | AGUUUUAAAACAUAAACUCCctc |               |
|              |         | GGAGAGGAGAGGAAGAAGtt   | CUUCUUCUCCUCUCCUUCctt   |               |
| NM_010063    | Dync1i1 | CCCAAAUUGGUCUAGAUUtt   | AAUCAUGACCAAUUUUGGtt    | Mm01135515_m1 |
|              |         | GGAAAGAAAACAGCAGAUctt  | GAUCUGCUGUUUUUCUUCctc   |               |
|              |         | CCAUUCUACGAGAAUUGUAAtt | UACAAUUCUCGUAGAAGGctc   |               |
| NM_010064    | Dync1i2 | GCAGAUUAACAUCUUCUUtt   | AAAGAAGAUUUAAUCUGctc    | Mm01333946_m1 |
|              |         | GGAAAGGAAAAAAGGAAAtt   | UUCUUUUUUUUCUUCctc      |               |
|              |         | CCACAUCAAGUUCACCCAGtt  | CUGGGUGAACUUGAUGGctc    |               |
| NM_007835    | Dctn1   | GGAGUAAUUCACAUUGUAtt   | UCACAUGUGAAUACUUCctt    | Mm01184845_m1 |
|              |         | CCUGGAAACAUCAGUAGUtt   | ACUACAUGAUGUUUCAGGctc   |               |
|              |         | GGAGUUUGACAAGAAGUctt   | GUACUUCUUGUCAAAACUCCctt |               |
| NM_019682    | Dync1l1 | GGUGGCCAUUCUUCUGUUCtt  | GAACAGAAGAAUGGCCACctg   | Mm00850282_g1 |
|              |         | GGACUGCAUCCAAUUCAtt    | UGGAAUUUGAUGCAGUCctt    |               |

|              |          |                        |                        |               |
|--------------|----------|------------------------|------------------------|---------------|
| NM_009342    | dynl1    | GGAACCACAUGACUUCAGCtt  | GCUGAAGUCAUGUGGUUCtG   | Not available |
|              |          | GGCAGUACCACUUGUCUUAAtt | UAAGACAAGUGGUACUGCCtG  |               |
|              |          | GGUGCUAAAAACUCAAGUCtt  | GACUUGAGUUUUUAGCACtt   |               |
| NM_025975    | Dynl3    | GCAUAGUGGAACAGUCUAUtt  | AUAGACUGUCCACUAUGCtt   | Mm00458834_m1 |
|              |          | GGCCAUUAACUUAAGUUUGtt  | CAAACUUAAGUUAUUGCCtt   |               |
|              |          | GCCCGUAUGGAUUUCACActt  | GUGUGAAAUCCAUCGGGGctc  |               |
| NM_025947    | Dynlrb1  | CCUUCUUCGAAUUCGCUCtt   | GAGCGAAUUCGAAGGAAGGtt  | Mm00508951_m1 |
|              |          | GGCUUUGGAAUGAGAGCUUtt  | AAGCUCUCAUJCCAAAGCCtg  |               |
|              |          | GGCAUCCCAUCAAGAGCAAtt  | UGCUCUUGAUGGGAAUGCCtt  |               |
| NM_026556    | Dynl12   | GGCCAUGGAGAAGUACAACtt  | GUUGUACUUCUCCAUGGCCtg  | Not available |
|              |          | GGACAUJGCUGCCUAUAUtt   | GAUAUAGGCAGCAAUGUCtt   |               |
|              |          | GGUCUGAAGUAUAGCAAUGtt  | CAUJGCUAUACUUCAGACCtg  |               |
| NM_029297    | dylnr2   | GGAAUAUCUUCUGAUJUGUCtt | GACAAUCAGAAGAUUUCCtt   | Mm00466467_m1 |
|              |          | CGAAUCCAUGAUUJUGUActt  | GUACAUAUCAUGGAUUCGtg   |               |
|              |          | CGACCUGACUUUUCUJAGGtt  | CCUAAGAAAAGUCAGGUCGtt  |               |
| NM_146229    | dync1li1 | CCGGCUAAGAAAGACA AUtt  | AAUUGUCUUUCUJAGCCGGtc  | Mm01353886_m1 |
|              |          | GCUACAGUCUCUUUJAGCAAtt | UGC UAAAAGAGACUJUGACtt |               |
|              |          | GCCUJGACUCGUUJGGAUtt   | AUCCAAAGCAGUCCAAGGtt   |               |
| NM_001013380 | dync1li2 | GCAGGUUAAGUAGCUGACAtt  | UGUCAGCUACUUAACCUCGtt  | Dync1li2      |
|              |          | CGUGCUGACUCAUAACCUGtt  | CAGGUUAUGAGUCAGCACGtt  |               |
|              |          | CGUAGCACUUCUCUCUUAAtt  | UAAGAGAAGAAGUGCUACGtt  |               |
